# Supplementary material for: A Cost-Effective and Straightforward Approach for Conducting Short- and Long-Term Biomonitoring of Gold Mine Waters
Source: MDPI journal article supplement (doi:10.3390/w15162883), 2023-08-09
Supplement: s1 [file s1]

## Supplementary materials

**Table S1.** Taxonomic richness of culturable microbiota (TRMB) and water invertebrates (TRWI) in 22 water sources from the Gold Mining Area of Zlatna

| Water sources | TRMB | TRWI |
|---------------|------|------|
| 1Up           | 3    | 8    |
| 2Dw           | 3    | 7    |
| 3Ad           | 3    | 2    |
| 5Sp           | 3    | 8    |
| 7Ad           | 3    | 7    |
| 8Up           | 3    | 6    |
| 10Up          | 3    | 6    |
| 11W           | 3    | 3    |
| 13Dw          | 3    | 5    |
| 16Dw          | 3    | 6    |
| 18Ad          | 3    | 8    |
| 19Mn          | 0    | 0    |
| 20Up          | 3    | 7    |
| 21Am          | 2    | 0    |
| 22Am          | 2    | 3    |
| 23Ad          | 3    | 12   |
| 24Up          | 3    | 3    |
| 25W           | 3    | 9    |
| 26Dw          | 3    | 0    |
| 27W           | 3    | 8    |
| 29Am          | 1    | 1    |
| 30Up          | 3    | 4    |

Table S2. Seasonal averages of precipitation (PP) and temperature at 2 meters above ground level (T2M) in the Gold Mining Area of Zlatna, sourced from the POWER Data Services databases [48,49]

| Season sampled | T2M (oC) | PP (mm/day) |
|----------------|----------|-------------|
| Spring 2015    | 15,56    | 2,42        |
| Summer 2015    | 23,54    | 2,19        |
| Autumn 2015    | 9,54     | 1,66        |
| Winter 2015    | 1,27     | 0,29        |
| Autumn 2022    | 6,51     | 1,72        |
| Winter 2023    | 2,58     | 2,2         |

**Table S3** . Total abundance (TA) of culturable microbiota (MB) and total water invertebrates (TWI) in 22 water sources from the Gold Mining Area of Zlatna

| Water sources | TC           | Y          | M           | WI         |
|---------------|--------------|------------|-------------|------------|
| 1Up           | 1108         | 38         | 12          | 9          |
| 2Dw           | 776          | 48         | 48          | 11         |
| 3Ad           | 130          | 9          | 11          | 4          |
| 5S            | 290          | 101        | 15          | 76         |
| 7Ad           | 81           | 2          | 1           | 47         |
| 8Up           | 114          | 2          | 9           | 55         |
| 10Up          | 630          | 32         | 309         | 20         |
| 11W           | 525          | 14         | 7           | 7          |
| 13Dw          | 868          | 57         | 35          | 14         |
| 16Dw          | 615          | 22         | 27          | 9          |
| 18Ad          | 437          | 12         | 27          | 30         |
| 19Mn          | 0            | 0          | 0           | 0          |
| 20Up          | 1142         | 87         | 38          | 28         |
| 21Mn          | 3            | 0          | 1           | 0          |
| 22Mn          | 1            | 0          | 8           | 4          |
| 23Ad          | 284          | 37         | 9           | 149        |
| 24Up          | 907          | 41         | 306         | 13         |
| 25W           | 496          | 55         | 2           | 100        |
| 26Dw          | 766          | 75         | 310         | 0          |
| 27W           | 706          | 256        | 3           | 80         |
| 29Mn          | 5            | 0          | 0           | 1          |
| 30Up          | 245          | 14         | 1           | 9          |
| <b>Total</b>  | <b>10129</b> | <b>902</b> | <b>1179</b> | <b>666</b> |

**Table S4** . Relative abundance (RA%) of culturable microbiota (MB) and total water invertebrates (TWI) in 22 water sources from the Gold Mining Area of Zlatna

| Water sources | TC    | Y     | M     | WI    |
|---------------|-------|-------|-------|-------|
| 1Up           | 10,94 | 4,21  | 1,02  | 1,35  |
| 2Dw           | 7,66  | 5,32  | 4,07  | 1,65  |
| 3Ad           | 1,28  | 1,00  | 0,93  | 0,60  |
| 5S            | 2,86  | 11,20 | 1,27  | 11,41 |
| 7Ad           | 0,80  | 0,22  | 0,08  | 7,06  |
| 8Up           | 1,13  | 0,22  | 0,76  | 8,26  |
| 10Up          | 6,22  | 3,55  | 26,21 | 3,00  |
| 11W           | 5,18  | 1,55  | 0,59  | 1,05  |
| 13Dw          | 8,57  | 6,32  | 2,97  | 2,10  |
| 16Dw          | 6,07  | 2,44  | 2,29  | 1,35  |
| 18Ad          | 4,31  | 1,33  | 2,29  | 4,50  |
| 19Mn          | 0,00  | 0,00  | 0,00  | 0,00  |
| 20Up          | 11,27 | 9,65  | 3,22  | 4,20  |
| 21Mn          | 0,03  | 0,00  | 0,08  | 0,00  |
| 22Mn          | 0,01  | 0,00  | 0,68  | 0,60  |
| 23Ad          | 2,80  | 4,10  | 0,76  | 22,37 |
| 24Up          | 8,95  | 4,55  | 25,95 | 1,95  |
| 25W           | 4,90  | 6,10  | 0,17  | 15,02 |
| 26Dw          | 7,56  | 8,31  | 26,29 | 0,00  |
| 27W           | 6,97  | 28,38 | 0,25  | 12,01 |
| 29Mn          | 0,05  | 0,00  | 0,00  | 0,15  |
| 30Up          | 2,42  | 1,55  | 0,08  | 1,35  |

**Table S5** . Frequency (F%) of culturable microbiota (MB) and total water invertebrates (TWI) in 22 water sources from the Gold Mining Area of Zlatna

| Water sources | TC    | Y     | M     | WI    |
|---------------|-------|-------|-------|-------|
| 1Up           | 10,94 | 4,21  | 1,02  | 1,35  |
| 2Dw           | 7,66  | 5,32  | 4,07  | 1,65  |
| 3Ad           | 1,28  | 1     | 0,93  | 0,6   |
| 5S            | 2,86  | 11,2  | 1,27  | 11,41 |
| 7Ad           | 0,8   | 0,22  | 0,08  | 7,06  |
| 8Up           | 1,13  | 0,22  | 0,76  | 8,26  |
| 10Up          | 6,22  | 3,55  | 26,21 | 3     |
| 11W           | 5,18  | 1,55  | 0,59  | 1,05  |
| 13Dw          | 8,57  | 6,32  | 2,97  | 2,1   |
| 16Dw          | 6,07  | 2,44  | 2,29  | 1,35  |
| 18Ad          | 4,31  | 1,33  | 2,29  | 4,5   |
| 19Mn          | 0     | 0     | 0     | 0     |
| 20Up          | 11,27 | 9,65  | 3,22  | 4,2   |
| 21Am          | 0,03  | 0     | 0,08  | 0     |
| 22Am          | 0,01  | 0     | 0,68  | 0,6   |
| 23Ad          | 2,8   | 4,1   | 0,76  | 22,37 |
| 24Up          | 8,95  | 4,55  | 25,95 | 1,95  |
| 25W           | 4,9   | 6,1   | 0,17  | 15,02 |
| 26Dw          | 7,56  | 8,31  | 26,29 | 0     |
| 27W           | 6,97  | 28,38 | 0,25  | 12,01 |
| 29Am          | 0,05  | 0     | 0     | 0,15  |
| 30Up          | 2,42  | 1,55  | 0,08  | 1,35  |

**Table S6** . Frequency (F%) of major taxa of water invertebrates (MTWI), in different water types (mine waters, adit waters, upstream waters, downstream waters, and groundwaters)

| MTWI | Adit  | Mine  | Downstream | Upstream | Groundwater |
|------|-------|-------|------------|----------|-------------|
| CLA  | 51,30 | 0,00  | 0,00       | 1,49     | 0,00        |
| OST  | 3,04  | 0,00  | 0,00       | 1,49     | 0,00        |
| CYC  | 3,04  | 20,00 | 0,00       | 0,00     | 9,13        |
| HAR  | 2,17  | 0,00  | 2,94       | 4,48     | 44,11       |
| NAU  | 2,61  | 0,00  | 0,00       | 0,00     | 14,07       |
| AMP  | 4,35  | 0,00  | 5,88       | 9,70     | 1,90        |
| ISO  | 0,43  | 0,00  | 2,94       | 0,00     | 0,38        |
| CLB  | 1,30  | 40,00 | 11,76      | 2,24     | 5,32        |
| COL  | 0,00  | 0,00  | 0,00       | 0,75     | 1,14        |
| DIP  | 15,22 | 40,00 | 41,18      | 48,51    | 5,32        |
| EFE  | 4,35  | 0,00  | 5,88       | 8,96     | 0,00        |
| MEG  | 0,00  | 0,00  | 2,94       | 0,00     | 0,38        |
| ODO  | 0,87  | 0,00  | 0,00       | 2,24     | 0,00        |
| PLE  | 5,22  | 0,00  | 11,76      | 13,43    | 1,90        |
| INF  | 3,04  | 0,00  | 11,76      | 4,48     | 13,31       |
| ACA  | 3,04  | 0,00  | 2,94       | 2,24     | 2,66        |
| GAS  | 0,00  | 0,00  | 0,00       | 0,00     | 0,38        |

**Table S7.**  
Differences in taxonomic richness of biota (TRB) between 2015 and 2022-2023 in the Gold Mining Area of Zlatna

| Water sources | Years     | TRB |
|---------------|-----------|-----|
| 1Up           | 2015      | 7   |
|               | 2022-2023 | 5   |
| 2Dw           | 2015      | 5   |
|               | 2022-2023 | 8   |
| 3Ad           | 2015      | 1   |
|               | 2022-2023 | 3   |
| 5Sp           | 2015      | 5   |
|               | 2022-2023 | 11  |
| 7Ad           | 2015      | 3   |
|               | 2022-2023 | 3   |
| 8Up           | 2015      | 5   |
|               | 2022-2023 | 6   |
| 10Up          | 2015      | 4   |
|               | 2022-2023 | 7   |
| 11W           | 2015      | 3   |
|               | 2022-2023 | 6   |
| 13Dw          | 2015      | 4   |
|               | 2022-2023 | 7   |
| 16Dw          | 2015      | 5   |
|               | 2022-2023 | 7   |
| 18Ad          | 2015      | 6   |
|               | 2022-2023 | 8   |
| 19Mn          | 2015      | 0   |
|               | 2022-2023 | 0   |
| 20Up          | 2015      | 7   |
|               | 2022-2023 | 6   |
| 21Am          | 2015      | 0   |
|               | 2022-2023 | 2   |
| 22Am          | 2015      | 0   |
|               | 2022-2023 | 1   |
| 23Ad          | 2015      | 7   |
|               | 2022-2023 | 10  |
| 24Up          | 2015      | 4   |
|               | 2022-2023 | 4   |
| 25W           | 2015      | 4   |
|               | 2022-2023 | 7   |
| 26Dw          | 2015      | 3   |
|               | 2022-2023 | 3   |
| 27W           | 2015      | 9   |
|               | 2022-2023 | 5   |
| 29Am          | 2015      | 2   |
|               | 2022-2023 | 1   |
| 30Up          | 2015      | 4   |
|               | 2022-2023 | 4   |
